# Supplementary material
Source: Elsevier journal article supplement (http://library.osu.edu/sites/msa/suppmat/v236.i1.pp42-51/mmc4.pdf)
Supplement: mmc4 [file mmc4.pdf]

# $^{48}\text{Ti}^{37}\text{Cl}$ Assigned Transitions

Transitions are labeled using four columns, the excited state J value ( $J'$ ), the ground state J value ( $J''$ ), the observed transition wavenumber (Observed) and the fit residual multiplied by  $10^3$  (O-C).

${}^4\Gamma_{5/2} - X^4\Phi_{3/2} (0,0)$ 

| J'   | J''  | Observed   | O-C  | J'   | J''  | Observed   | O-C  |
|------|------|------------|------|------|------|------------|------|
| 3.5  | 2.5  | 23845.2305 | 0.5  | 11.5 | 12.5 | 23840.2735 | -1.5 |
| 4.5  | 3.5  | 23845.5481 | 1.6  | 12.5 | 13.5 | 23839.9702 | -2.0 |
| 5.5  | 4.5  | 23845.8655 | 1.8  | 13.5 | 14.5 | 23839.6637 | -6.6 |
| 6.5  | 5.5  | 23846.1841 | 2.4  | 14.5 | 15.5 | 23839.3636 | -5.6 |
| 7.5  | 6.5  | 23846.5014 | 0.9  | 15.5 | 16.5 | 23839.0680 | -1.0 |
| 8.5  | 7.5  | 23846.8214 | 1.3  | 16.5 | 17.5 | 23838.7698 | 0.2  |
| 9.5  | 8.5  | 23847.1423 | 1.9  | 17.5 | 18.5 | 23838.4686 | -2.5 |
| 10.5 | 9.5  | 23847.4634 | 1.8  | 18.5 | 19.5 | 23838.1711 | -2.3 |
| 11.5 | 10.5 | 23847.7832 | -0.3 | 19.5 | 20.5 | 23837.8747 | -2.0 |
| 12.5 | 11.5 | 23848.1083 | 2.1  | 20.5 | 21.5 | 23837.5757 | -5.1 |
| 13.5 | 12.5 | 23848.4329 | 3.2  | 21.5 | 22.5 | 23837.2803 | -5.5 |
| 14.5 | 13.5 | 23848.7564 | 2.5  | 22.5 | 23.5 | 23836.9883 | -3.4 |
| 15.5 | 14.5 | 23849.0782 | -0.8 | 23.5 | 24.5 | 23836.6998 | 1.3  |
| 16.5 | 15.5 | 23849.4037 | -1.1 | 24.5 | 25.5 | 23836.4045 | -1.7 |
| 17.5 | 16.5 | 23849.7310 | -0.5 | 25.5 | 26.5 | 23836.1137 | -1.2 |
| 18.5 | 17.5 | 23850.0598 | 0.9  | 26.5 | 27.5 | 23835.8236 | -0.9 |
| 19.5 | 18.5 | 23850.3860 | -1.1 | 27.5 | 28.5 | 23835.5346 | -0.4 |
| 20.5 | 19.5 | 23850.7154 | -0.7 | 28.5 | 29.5 | 23835.2445 | -2.0 |
| 21.5 | 20.5 | 23851.0469 | 0.9  | 29.5 | 30.5 | 23834.9591 | 0.2  |
| 22.5 | 21.5 | 23851.3761 | -0.5 | 30.5 | 31.5 | 23834.6697 | -2.6 |
| 23.5 | 22.5 | 23851.7053 | -2.7 | 31.5 | 32.5 | 23834.3870 | 0.3  |
| 24.5 | 23.5 | 23852.0391 | -1.1 | 32.5 | 33.5 | 23834.1028 | 0.8  |
| 25.5 | 24.5 | 23852.3714 | -1.9 | 34.5 | 35.5 | 23833.5416 | 5.9  |
| 27.5 | 26.5 | 23853.0367 | -5.2 | 35.5 | 36.5 | 23833.2535 | -0.6 |
| 28.5 | 27.5 | 23853.3821 | 4.7  | 37.5 | 38.5 | 23832.6938 | -0.2 |
| 30.5 | 29.5 | 23854.0506 | -0.3 | 38.5 | 39.5 | 23832.4193 | 3.8  |
| 31.5 | 30.5 | 23854.3916 | 2.6  | 39.5 | 40.5 | 23832.1418 | 3.7  |
| 32.5 | 31.5 | 23854.7254 | -2.5 | 40.5 | 41.5 | 23831.8662 | 4.5  |
| 33.5 | 32.5 | 23855.0665 | -1.1 | 41.5 | 42.5 | 23831.5901 | 3.7  |
| 34.5 | 33.5 | 23855.4081 | -0.1 | 42.5 | 43.5 | 23831.3153 | 3.0  |
| 35.5 | 34.5 | 23855.7457 | -4.0 | 43.5 | 44.5 | 23831.0468 | 7.6  |
| 36.5 | 35.5 | 23856.0913 | -0.7 | 44.5 | 45.5 | 23830.7748 | 7.5  |
| 37.5 | 36.5 | 23856.4339 | -1.4 | 45.5 | 46.5 | 23830.5019 | 5.4  |
| 38.5 | 37.5 | 23856.7770 | -2.4 | 46.5 | 47.5 | 23830.2335 | 6.6  |
| 39.5 | 38.5 | 23857.1273 | 2.9  | 47.5 | 48.5 | 23829.9598 | 1.4  |
| 40.5 | 39.5 | 23857.4715 | 1.2  | 48.5 | 49.5 | 23829.6901 | -1.0 |
| 41.5 | 40.5 | 23857.8176 | 0.5  | 49.5 | 50.5 | 23829.4260 | 0.9  |
| 42.5 | 41.5 | 23858.1667 | 1.8  | 50.5 | 51.5 | 23829.1615 | 1.3  |
| 43.5 | 42.5 | 23858.5164 | 2.9  | 51.5 | 52.5 | 23828.8985 | 2.0  |
| 44.5 | 43.5 | 23858.8638 | 0.7  | 52.5 | 53.5 | 23828.6374 | 3.3  |
| 45.5 | 44.5 | 23859.2136 | -0.1 | 53.5 | 54.5 | 23828.3733 | 0.3  |
| 46.5 | 45.5 | 23859.5654 | 0.2  | 54.5 | 55.5 | 23828.1140 | 0.9  |
| 47.5 | 46.5 | 23859.9105 | -7.2 | 55.5 | 56.5 | 23827.8537 | -0.8 |
| 4.5  | 5.5  | 23842.4177 | 0.2  | 56.5 | 57.5 | 23827.5938 | -3.4 |
| 6.5  | 7.5  | 23841.8008 | -0.5 | 57.5 | 58.5 | 23827.3386 | -2.6 |
| 7.5  | 8.5  | 23841.4932 | -1.2 | 58.5 | 59.5 | 23827.0842 | -2.4 |
| 8.5  | 9.5  | 23841.1863 | -2.0 | 59.5 | 60.5 | 23826.8297 | -3.6 |

|      |      |            |     |      |      |            |      |
|------|------|------------|-----|------|------|------------|------|
| 9.5  | 10.5 | 23840.8839 | 0.9 | 60.5 | 61.5 | 23826.5755 | -5.9 |
| 10.5 | 11.5 | 23840.5799 | 1.3 |      |      |            |      |

${}^4\Gamma_{5/2} - X^4\Phi_{5/2} (0,0)$

| J'   | J''  | Observed   | O-C  | J'   | J''  | Observed   | O-C  |
|------|------|------------|------|------|------|------------|------|
| 5.5  | 4.5  | 23735.2362 | 1.2  | 41.5 | 40.5 | 23746.4908 | 1.1  |
| 6.5  | 5.5  | 23735.5511 | 2.7  | 42.5 | 41.5 | 23746.8030 | 0.3  |
| 7.5  | 6.5  | 23735.8667 | 5.1  | 43.5 | 42.5 | 23747.1155 | -0.3 |
| 8.5  | 7.5  | 23736.1774 | 2.6  | 44.5 | 43.5 | 23747.4280 | -1.0 |
| 9.5  | 8.5  | 23736.4878 | -0.2 | 45.5 | 44.5 | 23747.7436 | 1.2  |
| 10.5 | 9.5  | 23736.8016 | 0.6  | 46.5 | 45.5 | 23748.0559 | 0.0  |
| 11.5 | 10.5 | 23737.1138 | -0.3 | 47.5 | 46.5 | 23748.3695 | -0.1 |
| 12.5 | 11.5 | 23737.4271 | 0.1  | 48.5 | 47.5 | 23748.6795 | -3.9 |
| 13.5 | 12.5 | 23737.7432 | 3.3  | 49.5 | 48.5 | 23748.9968 | -0.7 |
| 14.5 | 13.5 | 23738.0534 | 0.7  | 6.5  | 7.5  | 23731.1582 | 2.1  |
| 15.5 | 14.5 | 23738.3668 | 1.4  | 7.5  | 8.5  | 23730.8425 | 0.6  |
| 16.5 | 15.5 | 23738.6788 | 0.7  | 8.5  | 9.5  | 23730.5309 | 3.1  |
| 17.5 | 16.5 | 23738.9936 | 2.8  | 9.5  | 10.5 | 23730.2139 | 0.3  |
| 18.5 | 17.5 | 23739.3031 | -0.2 | 10.5 | 11.5 | 23729.9019 | 2.5  |
| 19.5 | 18.5 | 23739.6176 | 1.7  | 11.5 | 12.5 | 23729.5856 | 0.4  |
| 20.5 | 19.5 | 23739.9316 | 3.2  | 12.5 | 13.5 | 23729.2740 | 3.0  |
| 21.5 | 20.5 | 23740.2443 | 3.5  | 13.5 | 14.5 | 23728.9612 | 4.5  |
| 22.5 | 21.5 | 23740.5539 | 0.6  | 14.5 | 15.5 | 23728.6420 | -0.5 |
| 23.5 | 22.5 | 23740.8643 | -1.3 | 15.5 | 16.5 | 23728.3332 | 4.9  |
| 24.5 | 23.5 | 23741.1790 | 1.0  | 16.5 | 17.5 | 23728.0115 | -2.5 |
| 25.5 | 24.5 | 23741.4886 | -1.7 | 17.5 | 18.5 | 23727.6946 | -5.3 |
| 26.5 | 25.5 | 23741.8056 | 3.0  | 18.5 | 19.5 | 23727.3808 | -4.9 |
| 27.5 | 26.5 | 23742.1168 | 1.9  | 19.5 | 20.5 | 23727.0654 | -6.2 |
| 28.5 | 27.5 | 23742.4268 | -0.4 | 20.5 | 21.5 | 23726.7544 | -3.1 |
| 29.5 | 28.5 | 23742.7381 | -1.4 | 21.5 | 22.5 | 23726.4377 | -5.7 |
| 30.5 | 29.5 | 23743.0542 | 2.4  | 22.5 | 23.5 | 23726.1241 | -5.4 |
| 31.5 | 30.5 | 23743.3626 | -1.6 | 23.5 | 24.5 | 23725.8127 | -2.8 |
| 32.5 | 31.5 | 23743.6754 | -1.1 | 24.5 | 25.5 | 23725.4980 | -3.7 |
| 33.5 | 32.5 | 23743.9879 | -1.0 | 25.5 | 26.5 | 23725.1839 | -4.1 |
| 34.5 | 33.5 | 23744.3001 | -1.2 | 26.5 | 27.5 | 23724.8700 | -4.3 |
| 35.5 | 34.5 | 23744.6153 | 1.6  | 27.5 | 28.5 | 23724.5600 | -0.8 |
| 36.5 | 35.5 | 23744.9267 | 0.5  | 28.5 | 29.5 | 23724.2470 | -0.4 |
| 37.5 | 36.5 | 23745.2361 | -2.6 | 29.5 | 30.5 | 23723.9337 | -0.4 |
| 38.5 | 37.5 | 23745.5517 | 0.3  | 30.5 | 31.5 | 23723.6223 | 1.4  |
| 39.5 | 38.5 | 23745.8674 | 3.4  | 31.5 | 32.5 | 23723.3076 | -0.3 |
| 40.5 | 39.5 | 23746.1762 | -0.6 |      |      |            |      |

${}^4\Gamma_{7/2} - X^4\Phi_{5/2} (0,0)$

| J'  | J'' | Observed   | O-C | J'   | J''  | Observed   | O-C  |
|-----|-----|------------|-----|------|------|------------|------|
| 3.5 | 2.5 | 23899.8568 | 6.0 | 28.5 | 27.5 | 23907.9506 | 0.6  |
| 4.5 | 3.5 | 23900.1725 | 5.1 | 29.5 | 28.5 | 23908.2801 | -2.2 |
| 5.5 | 4.5 | 23900.4901 | 5.6 | 30.5 | 29.5 | 23908.6151 | -0.1 |
| 6.5 | 5.5 | 23900.8063 | 4.0 | 3.5  | 4.5  | 23897.3460 | 5.2  |
| 7.5 | 6.5 | 23901.1251 | 4.5 | 4.5  | 5.5  | 23897.0334 | 3.5  |

|      |      |            |      |      |      |            |      |
|------|------|------------|------|------|------|------------|------|
| 8.5  | 7.5  | 23901.4419 | 2.3  | 5.5  | 6.5  | 23896.7241 | 4.5  |
| 9.5  | 8.5  | 23901.7613 | 2.1  | 6.5  | 7.5  | 23896.4143 | 4.4  |
| 10.5 | 9.5  | 23902.0791 | -0.3 | 10.5 | 11.5 | 23895.1804 | 2.6  |
| 11.5 | 10.5 | 23902.4008 | 0.6  | 11.5 | 12.5 | 23894.8775 | 6.1  |
| 12.5 | 11.5 | 23902.7235 | 1.8  | 12.5 | 13.5 | 23894.5630 | -2.7 |
| 13.5 | 12.5 | 23903.0427 | -1.0 | 13.5 | 14.5 | 23894.2625 | 1.9  |
| 14.5 | 13.5 | 23903.3661 | -0.3 | 14.5 | 15.5 | 23893.9562 | 0.0  |
| 15.5 | 14.5 | 23903.6880 | -1.7 | 15.5 | 16.5 | 23893.6536 | 1.1  |
| 16.5 | 15.5 | 23904.0105 | -3.1 | 16.5 | 17.5 | 23893.3488 | -0.7 |
| 17.5 | 16.5 | 23904.3345 | -3.6 | 17.5 | 18.5 | 23893.0454 | -1.8 |
| 18.5 | 17.5 | 23904.6601 | -3.2 | 18.5 | 19.5 | 23892.7451 | -0.5 |
| 19.5 | 18.5 | 23904.9866 | -2.5 | 19.5 | 20.5 | 23892.4428 | -1.9 |
| 20.5 | 19.5 | 23905.3124 | -3.1 | 20.5 | 21.5 | 23892.1428 | -1.8 |
| 21.5 | 20.5 | 23905.6390 | -3.5 | 21.5 | 22.5 | 23891.8477 | 2.6  |
| 22.5 | 21.5 | 23905.9652 | -5.0 | 23.5 | 24.5 | 23891.2437 | -4.8 |
| 23.5 | 22.5 | 23906.2929 | -5.6 | 26.5 | 27.5 | 23890.3543 | -4.8 |
| 24.5 | 23.5 | 23906.6209 | -6.6 | 28.5 | 29.5 | 23889.7698 | -0.3 |
| 25.5 | 24.5 | 23906.9544 | -2.8 | 29.5 | 30.5 | 23889.4764 | -0.4 |
| 26.5 | 25.5 | 23907.2832 | -4.2 | 30.5 | 31.5 | 23889.1878 | 3.5  |
| 27.5 | 26.5 | 23907.6170 | -1.4 | 31.5 | 32.5 | 23888.8945 | 1.9  |

${}^4\Gamma_{7/2} - X^4\Phi_{7/2} (0,0)$

| J'   | J''  | Observed   | O-C   | J'   | J''  | Observed   | O-C  |
|------|------|------------|-------|------|------|------------|------|
| 4.5  | 3.5  | 23789.4707 | 5.2   | 36.5 | 35.5 | 23799.3924 | 8.5  |
| 5.5  | 4.5  | 23789.7882 | 9.4   | 37.5 | 36.5 | 23799.7003 | 9.2  |
| 6.5  | 5.5  | 23790.0991 | 7.2   | 38.5 | 37.5 | 23800.0076 | 9.4  |
| 7.5  | 6.5  | 23790.4061 | 1.4   | 39.5 | 38.5 | 23800.3213 | 16.1 |
| 8.5  | 7.5  | 23790.7217 | 4.4   | 40.5 | 39.5 | 23800.6307 | 18.6 |
| 9.5  | 8.5  | 23791.0301 | 0.4   | 42.5 | 41.5 | 23801.2511 | 25.3 |
| 10.5 | 9.5  | 23791.3404 | -1.4  | 43.5 | 42.5 | 23801.5604 | 27.8 |
| 11.5 | 10.5 | 23791.6560 | 2.3   | 3.5  | 3.5  | 23788.0519 | 1.1  |
| 12.5 | 11.5 | 23791.9645 | -0.9  | 5.5  | 6.5  | 23786.0075 | 3.8  |
| 13.5 | 12.5 | 23792.2705 | -6.3  | 6.5  | 7.5  | 23785.6888 | 1.2  |
| 14.5 | 13.5 | 23792.5774 | -10.6 | 7.5  | 8.5  | 23785.3717 | 0.3  |
| 15.5 | 14.5 | 23792.8908 | -8.1  | 8.5  | 9.5  | 23785.0561 | 1.2  |
| 16.5 | 15.5 | 23793.2063 | -3.4  | 9.5  | 10.5 | 23784.7381 | -0.2 |
| 17.5 | 16.5 | 23793.5185 | -1.7  | 10.5 | 11.5 | 23784.4253 | 3.8  |
| 18.5 | 17.5 | 23793.8278 | -2.7  | 11.5 | 12.5 | 23784.1079 | 3.5  |
| 19.5 | 18.5 | 23794.1363 | -4.3  | 12.5 | 13.5 | 23783.7876 | 0.4  |
| 20.5 | 19.5 | 23794.4431 | -7.4  | 13.5 | 14.5 | 23783.4731 | 3.2  |
| 21.5 | 20.5 | 23794.7559 | -4.2  | 14.5 | 15.5 | 23783.1526 | 0.3  |
| 22.5 | 21.5 | 23795.0683 | -1.3  | 15.5 | 16.5 | 23782.8343 | -0.3 |
| 23.5 | 22.5 | 23795.3760 | -2.8  | 16.5 | 17.5 | 23782.5184 | 1.7  |
| 24.5 | 23.5 | 23795.6850 | -2.9  | 17.5 | 18.5 | 23782.1953 | -3.4 |
| 25.5 | 24.5 | 23795.9909 | -5.9  | 18.5 | 19.5 | 23781.8799 | -0.7 |
| 26.5 | 25.5 | 23796.3005 | -5.0  | 19.5 | 20.5 | 23781.5604 | -1.9 |
| 27.5 | 26.5 | 23796.6061 | -7.9  | 20.5 | 21.5 | 23781.2431 | -0.8 |
| 28.5 | 27.5 | 23796.9124 | -10.0 | 21.5 | 22.5 | 23780.9226 | -2.8 |
| 29.5 | 28.5 | 23797.2379 | 7.4   | 22.5 | 23.5 | 23780.6070 | 0.2  |

|      |      |            |     |      |      |            |      |
|------|------|------------|-----|------|------|------------|------|
| 30.5 | 29.5 | 23797.5393 | 0.7 | 23.5 | 24.5 | 23780.2849 | -3.2 |
| 31.5 | 30.5 | 23797.8478 | 1.3 | 24.5 | 25.5 | 23779.9667 | -2.6 |
| 32.5 | 31.5 | 23798.1586 | 4.4 | 25.5 | 26.5 | 23779.6509 | 0.5  |
| 33.5 | 32.5 | 23798.4633 | 1.5 | 26.5 | 27.5 | 23779.3300 | -1.5 |
| 34.5 | 33.5 | 23798.7764 | 7.1 | 27.5 | 28.5 | 23779.0087 | -3.8 |
| 35.5 | 34.5 | 23799.0862 | 9.5 | 28.5 | 29.5 | 23778.6912 | -2.3 |

$${}^4\Gamma_{5/2} - X^4\Phi_{3/2}(1,1)$$

| J'   | J''  | Observed   | O-C  | J'   | J''  | Observed   | O-C  |
|------|------|------------|------|------|------|------------|------|
| 4.5  | 3.5  | 23872.3653 | -1.7 | 27.5 | 26.5 | 23879.9364 | 0.6  |
| 5.5  | 4.5  | 23872.6836 | -0.9 | 29.5 | 28.5 | 23880.6191 | -0.2 |
| 6.5  | 5.5  | 23873.0020 | -1.0 | 30.5 | 29.5 | 23880.9630 | 0.6  |
| 7.5  | 6.5  | 23873.3221 | -0.5 | 3.5  | 4.5  | 23869.5589 | -0.7 |
| 8.5  | 7.5  | 23873.6416 | -1.7 | 4.5  | 5.5  | 23869.2514 | -1.8 |
| 9.5  | 8.5  | 23873.9608 | -4.3 | 5.5  | 6.5  | 23868.9519 | 3.9  |
| 10.5 | 9.5  | 23874.2915 | 3.6  | 6.5  | 7.5  | 23868.6437 | -0.1 |
| 11.5 | 10.5 | 23874.6137 | 1.8  | 7.5  | 8.5  | 23868.3404 | -0.4 |
| 12.5 | 11.5 | 23874.9402 | 3.3  | 9.5  | 10.5 | 23867.7395 | 1.5  |
| 13.5 | 12.5 | 23875.2640 | 1.1  | 10.5 | 11.5 | 23867.4389 | 0.6  |
| 14.5 | 13.5 | 23875.5918 | 1.8  | 11.5 | 12.5 | 23867.1404 | 0.7  |
| 15.5 | 14.5 | 23875.9207 | 2.5  | 12.5 | 13.5 | 23866.8415 | -0.8 |
| 16.5 | 15.5 | 23876.2464 | -1.0 | 13.5 | 14.5 | 23866.5438 | -2.1 |
| 17.5 | 16.5 | 23876.5772 | -0.4 | 14.5 | 15.5 | 23866.2500 | -0.7 |
| 18.5 | 17.5 | 23876.9086 | -0.3 | 15.5 | 16.5 | 23865.9570 | 0.4  |
| 19.5 | 18.5 | 23877.2400 | -1.2 | 16.5 | 17.5 | 23865.6648 | 1.2  |
| 20.5 | 19.5 | 23877.5744 | -0.1 | 17.5 | 18.5 | 23865.3720 | 0.3  |
| 21.5 | 20.5 | 23877.9059 | -3.0 | 18.5 | 19.5 | 23865.0800 | -0.9 |
| 22.5 | 21.5 | 23878.2440 | -0.2 | 19.5 | 20.5 | 23864.7933 | 2.1  |
| 24.5 | 23.5 | 23878.9190 | 1.1  | 20.5 | 21.5 | 23864.5006 | -2.1 |
| 25.5 | 24.5 | 23879.2549 | -1.3 | 24.5 | 25.5 | 23863.3597 | 0.3  |
| 26.5 | 25.5 | 23879.5957 | 0.2  |      |      |            |      |
